# Supplementary material
Source: PubMed Central journal article supplement (PMC11058930)
Supplement: 125_2024_6122_MOESM1_ESM.pdf [file 125_2024_6122_MOESM1_ESM.pdf]

## Supplementary Material

### Index

|                                      | <b>Page</b> |
|--------------------------------------|-------------|
| Methodology                          | 2           |
| Randomisation                        | 2           |
| Pre-testing                          | 2           |
| Mixed-Meal Tolerance Test            | 3           |
| Sample size                          | 3           |
| Blood sample collection and analysis | 3           |
| Calculations                         | 5           |
| References                           | 7           |
| Supplementary Table 1                | 8           |
| Supplementary Figure 1               | 9           |

1 Methodology

2

3 *Randomisation*

4 To ensure blinding, the lead investigator generated a randomisation sequence using the Excel  
5 'RAND' function, which was then handed to a member of research staff who was not  
6 associated with experimental testing. This researcher then assigned the sequence to  
7 conditions, keeping the resultant document under password protection. Preload drinks were  
8 then prepared by another member of research staff not associated with experimental testing.  
9 The blinding sequence was only revealed once data collection analysis for the study was  
10 complete.

11

12 *Pretesting*

13 Prior to inclusion in the study, participants completed a screening visit during which body  
14 mass, height, and blood pressure were recorded, and a fasting blood sample was collected to  
15 assess circulating glycosylated haemoglobin and fasting plasma glucose. Participants were given  
16 a 24-hour food log to complete on the day before their first experimental trial, with the  
17 instruction that this would then need to be replicated before their second experimental trial.  
18 Participants were instructed to avoid foods with naturally high enrichments of the Carbon-13  
19 isotope ( $^{13}\text{C}$ ) in the three days before each trial, namely: maize, pineapple, sugar cane, millet,  
20 purslane, tropical fruits, canned foods, tequila, and some fish (trout, haddock, tuna, whiting).  
21 Participants were also provided with a three-day diet diary to record their habitual dietary  
22 intake for two weekdays and one weekend day. Participants were instructed to abstain from  
23 taking their medication at least 12 h prior to each experimental trial.

24

25

26 *Mixed-Meal Tolerance Test*

27 The mixed-meal tolerance test (MMTT) contained 250 mL whole milk, 50 g dextrose, 18.7 g  
28 skimmed milk powder, and 9 g of full fat milk powder.

29

30 *Sample size*

31 A priori sample size estimate was based on previous work that demonstrated a reduction in  
32 the incremental area under the postprandial blood glucose curve with ketone monoester  
33 supplementation compared to placebo in response to glucose ingestion in adults with obesity  
34 (1). Based on these data, we assumed an effect size of  $d=1.0$ , which we considered a large  
35 and clinically relevant reduction in blood glucose for this preliminary study. The a priori  
36 primary outcome was defined as the rate of endogenous glucose production (EGP), which can  
37 only be captured using glucose tracers, is a strong predictor of the postprandial glucose  
38 response in people living with type 2 diabetes (2), and we hypothesized played a key role in  
39 the glucose-lowering mechanisms of elevated  $\beta$ -OHB (3). A sample size calculation  
40 (G\*Power v3.1) for a paired t-test estimated a sample size of 10 was required for 80% power  
41 to detect a two-tailed difference at a significance level of 0.05 with an effect size of  $d=1.0$ .

42

43 *Blood Sample Collection and Analyses*

44 Ten mL of arterialised-venous blood (with the exception of the venous samples at baseline)  
45 were collected into a syringe at each time point. A 20  $\mu$ L plastic capillary tube was  
46 immediately filled with whole blood and analysed for blood glucose concentrations (Biosen  
47 C-Line GP+). Five mL of that sample were added to EDTA-containing tubes (BD vacutainer  
48 LH; BD Diagnostics, Nu-Care) and centrifuged for 10 min at 4000 rpm at 4 °C. The plasma  
49 supernatant was then removed, aliquoted, and stored at -80 °C for subsequent analyses. The  
50 remaining 5 mL of blood were added to serum-separating Silica containing vacutainers (BD

51 vacutainers SST II, BD Diagnostics, Nu-Care) and left upright to clot at room temperature for  
52 30 min before being centrifuged for 10 min at 4000 rpm at 4 °C. The serum supernatant was  
53 then removed, aliquoted, and stored at -80°C for subsequent analyses.

54

55 Serum insulin and non-esterified fatty acid (NEFA) concentrations were analysed using  
56 commercially available assay kits (DRG Insulin ELISA, EIA-2935, DRG International Inc.,  
57 and Randox NEFA Assay, FA 115, Randox Laboratories Ltd.). Plasma  $\beta$ -OHB was measured  
58 using a commercially available kit (Cayman Chemicals, Ann Arbor, MI). All the samples  
59 were batch analysed after data collection was completed, and all the samples for a given  
60 participant were run within the same assay.

61

62 Enrichments of intravenously and orally administered [6,6-<sup>2</sup>H<sub>2</sub>]glucose and [U-<sup>13</sup>C<sub>6</sub>]glucose,  
63 respectively, were determined in the collected plasma samples by gas chromatography-mass  
64 spectrometry (GC-MS). Samples were deproteinised by adding 300  $\mu$ L of ice-cold methanol  
65 to 50  $\mu$ L of plasma and placed on ice for 30 min. Following centrifugation for 12 min at  
66 12000 g at 4 °C, 300  $\mu$ L of supernatant were transferred to a glass screw-neck vial and air-  
67 dried. Anhydride:pyridine (2:1) was added to the air-dried samples, vortexed, and left at  
68 room temperature for 30 min to form a penta-acetate glucose derivative. The samples were  
69 then analysed by GC-MS (6890N GC coupled with a 5975B MSD; Agilent Technologies) in  
70 duplicate using electron impact ionisation and selected ion monitoring for measurement of  
71 isotope ratios. One  $\mu$ L of the sample was injected in splitless mode (injector temperature of  
72 280 °C). Peaks were resolved using an HP5-MS 30 m  $\times$  0.25 mm ID  $\times$  0.25  $\mu$ m capillary  
73 column (Agilent). Helium was used as carrier gas at 1.2 mL $\cdot$ min<sup>-1</sup> constant flow rate. The  
74 temperature ramp was set from 80 – 260 °C at 15 °C $\cdot$ min<sup>-1</sup>. Selected ion recording conditions  
75 were used to monitor fragments m/z 200, 202 and 205 for glucose.

76 *Calculations*

77 Total rate of glucose appearance (RaT) ( $\text{mg}\cdot\text{kg}^{-1}\cdot\text{min}^{-1}$ ) (Eq. 1) was calculated by using the  
 78 non-steady state equation of Steele as adapted by De Bodo (4), with a value of  $0.23 \text{ L}\cdot\text{kg}^{-1}$  for  
 79 volume of distribution (V) as proposed by Livesey, and a pool fraction value of 1 (5).

80  $F_{[6,6-^2\text{H}_2]\text{-glucose}}$  is the  $[6,6-^2\text{H}_2]$ -glucose infusion rate ( $0.07 \text{ mg}\cdot\text{kg}^{-1}\cdot\text{min}^{-1}$ ), p is the pool  
 81 fraction (1L), 180.16 is the molecular weight of glucose ( $\text{g}\cdot\text{mol}^{-1}$ ),  $C_1$  and  $C_2$  are the glucose  
 82 concentrations at  $t_1$  and  $t_2$  ( $\text{mmol}\cdot\text{L}^{-1}$ ), respectively,  $IE1_{[6,6-^2\text{H}_2]\text{-glucose}}$  and  
 83  $IE2_{[6,6-^2\text{H}_2]\text{-glucose}}$  are the plasma  $[6,6-^2\text{H}_2]$ -glucose isotopic enrichments at  $t_1$  and  $t_2$ ,  
 84 respectively (mol % excess (MPE)), and  $t_1$  and  $t_2$  are the first and second collection time  
 85 points (min), respectively.

86

87

88 Eq.1:  $RaT =$

$$89 \frac{F_{[6,6-^2\text{H}_2]\text{-glucose}} - pV \cdot 180.16 \cdot \frac{(C_1 + C_2)}{2} \cdot \left( \frac{IE2_{[6,6-^2\text{H}_2]\text{-glucose}} - IE1_{[6,6-^2\text{H}_2]\text{-glucose}}}{t_2 - t_1} \right)}{\left( \frac{IE1_{[6,6-^2\text{H}_2]\text{-glucose}} + IE2_{[6,6-^2\text{H}_2]\text{-glucose}}}{2} \right)}$$

90

91 Exogenous rate of glucose appearance (RaE) ( $\text{mg}\cdot\text{kg}^{-1}\cdot\text{min}^{-1}$ ) (Eq. 2) was calculated using  
 92 Steele's equation for non-steady state (6) as adapted by Schneiter, where  $F_{infusion}$  is the total  
 93 glucose infusion rate ( $0.07 \text{ mg}\cdot\text{kg}^{-1}\cdot\text{min}^{-1}$ ), V is the volume of distribution for glucose ( $0.23$   
 94  $\text{L}\cdot\text{kg}^{-1}\cdot\text{min}^{-1}$ ),  $IE1_{[13\text{C}_6]\text{-glucose}}$  and  $IE2_{[13\text{C}_6]\text{-glucose}}$  are the plasma  $[13\text{C}_6]$ -glucose isotopic  
 95 enrichment at  $t_1$  and  $t_2$  (mol % excess (MPE)), respectively,  $[U-^{13}\text{C}_6]\text{glucose}$  is the amount of  
 96  $[U-^{13}\text{C}_6]\text{glucose}$  ingested (g) and glucose is the total amount (labelled and unlabelled) of  
 97 glucose ingested (g).

98

99 Eq. 2:  $RaE =$

100 
$$\frac{(RaT - F_{infusion}) \cdot \left( \frac{IE^1_{[13C_6]-glucose} + IE^2_{[U-13C_6]-glucose}}{2} \right) + pV \cdot 180.16 \cdot \frac{(C_1 + C_2)}{2} \cdot \left( \frac{IE^2_{[U-13C_6]-glucose} - IE^1_{[U-13C_6]-glucose}}{t_2 - t_1} \right)}{\left( \frac{[U-13C_6]-glucose}{glucose} \right)}$$

101

102 Endogenous glucose production (EGP) was calculated as RaT - RaE. Identical behaviour of  
103 labelled and unlabelled glucose molecules was assumed throughout, and the baseline sample  
104 for each trial was used to account for background isotopic enrichments. After calculating  
105 RaT, Rd, and RaE for each time-point, data were then smoothed using Graphpad Prism 9. A  
106 spline curve was fitted to each individual's data between the time periods; 0-60 min, 60-180  
107 min and 180-240 min (7). The program interpolated at time intervals of 1 min which was  
108 used to calculate individual total appearance and disappearance of glucose in grams (0-120  
109 min, 120-240 min, and 0-240 min). EGP was calculated using the interpolated data from RaT  
110 and RaE. These data were then fitted with a spline curve as described.

111

## References

1. Myette-Côté É, Caldwell HG, Ainslie PN, Clarke K, Little JP. A ketone monoester drink reduces the glycemic response to an oral glucose challenge in individuals with obesity: a randomized trial. *The American Journal of Clinical Nutrition* 2019;110:1491-1501
2. Rizza RA. Pathogenesis of Fasting and Postprandial Hyperglycemia in Type 2 Diabetes: Implications for Therapy. *Diabetes* 2010;59:2697-2707
3. Falkenhain K, Islam H, Little JP. Exogenous ketone supplementation: an emerging tool for physiologists with potential as a metabolic therapy. *Experimental Physiology* 2023;108:177-187
4. Debedo RC, Steele R, Altszuler N, Dunn A, Bishop JS. ON THE HORMONAL REGULATION OF CARBOHYDRATE METABOLISM; STUDIES WITH C14 GLUCOSE. *Recent Prog Horm Res* 1963;19:445-488
5. Livesey G, Wilson PDG, Dainty JR, Brown JC, Faulks RM, Roe MA, Newman TA, Eagles J, Mellon FA, Greenwood RH. Simultaneous time-varying systemic appearance of oral and hepatic glucose in adults monitored with stable isotopes. *American Journal of Physiology-Endocrinology and Metabolism* 1998;275:E717-E728
6. Steele R, Wall JS, Bodo RCd, Altszuler N. Measurement of Size and Turnover Rate of Body Glucose Pool by the Isotope Dilution Method. *American Journal of Physiology-Legacy Content* 1956;187:15-24
7. Wolfe RR, Chinkes DL. *Isotope tracers in metabolic research: principles and practice of kinetic analysis*. John Wiley & Sons, 2005

ESM Table 1. Participant Characteristics

| Participant Characteristics, mean $\pm$ SEM      |                  |
|--------------------------------------------------|------------------|
| Age (y)                                          | 59 $\pm$ 1.7     |
| Sex (m/f)                                        | 5/5              |
| Body mass (kg)                                   | 95 $\pm$ 4.5     |
| BMI (kg·m <sup>-2</sup> )                        | 32.0 $\pm$ 1.0   |
| Systolic Blood pressure (mmHg)                   | 129 $\pm$ 3.7    |
| Diastolic Blood pressure (mmHg)                  | 75 $\pm$ 3.4     |
| HbA <sub>1c</sub> (mmol/l)                       | 54 $\pm$ 2.4     |
| Fasting plasma glucose (mmol/l)                  | 7.6 $\pm$ 0.5    |
| Diagnosed (y)                                    | 6.4 $\pm$ 1.6    |
| Diabetes Medication, N (%)                       |                  |
| Metformin                                        | 4 (40)           |
| Gliclazide                                       | 1 (10)           |
| Pioglitazone                                     | 1 (10)           |
| Habitual Dietary Intake, mean $\pm$ SEM          |                  |
| Energy (MJ·d <sup>-1</sup> )                     | 8.7 $\pm$ 0.9    |
| Energy (kcal·d <sup>-1</sup> )                   | 2091 $\pm$ 230.7 |
| Protein (g·d <sup>-1</sup> )                     | 95 $\pm$ 9.0     |
| Protein (g·kg <sup>-1</sup> BM·d <sup>-1</sup> ) | 1.0 $\pm$ 0.1    |
| Carbohydrate (g·d <sup>-1</sup> )                | 186 $\pm$ 25.4   |
| Fat (g·d <sup>-1</sup> )                         | 97 $\pm$ 12.5    |
| Fibre (g·d <sup>-1</sup> )                       | 28 $\pm$ 5.8     |



ESM Figure 1

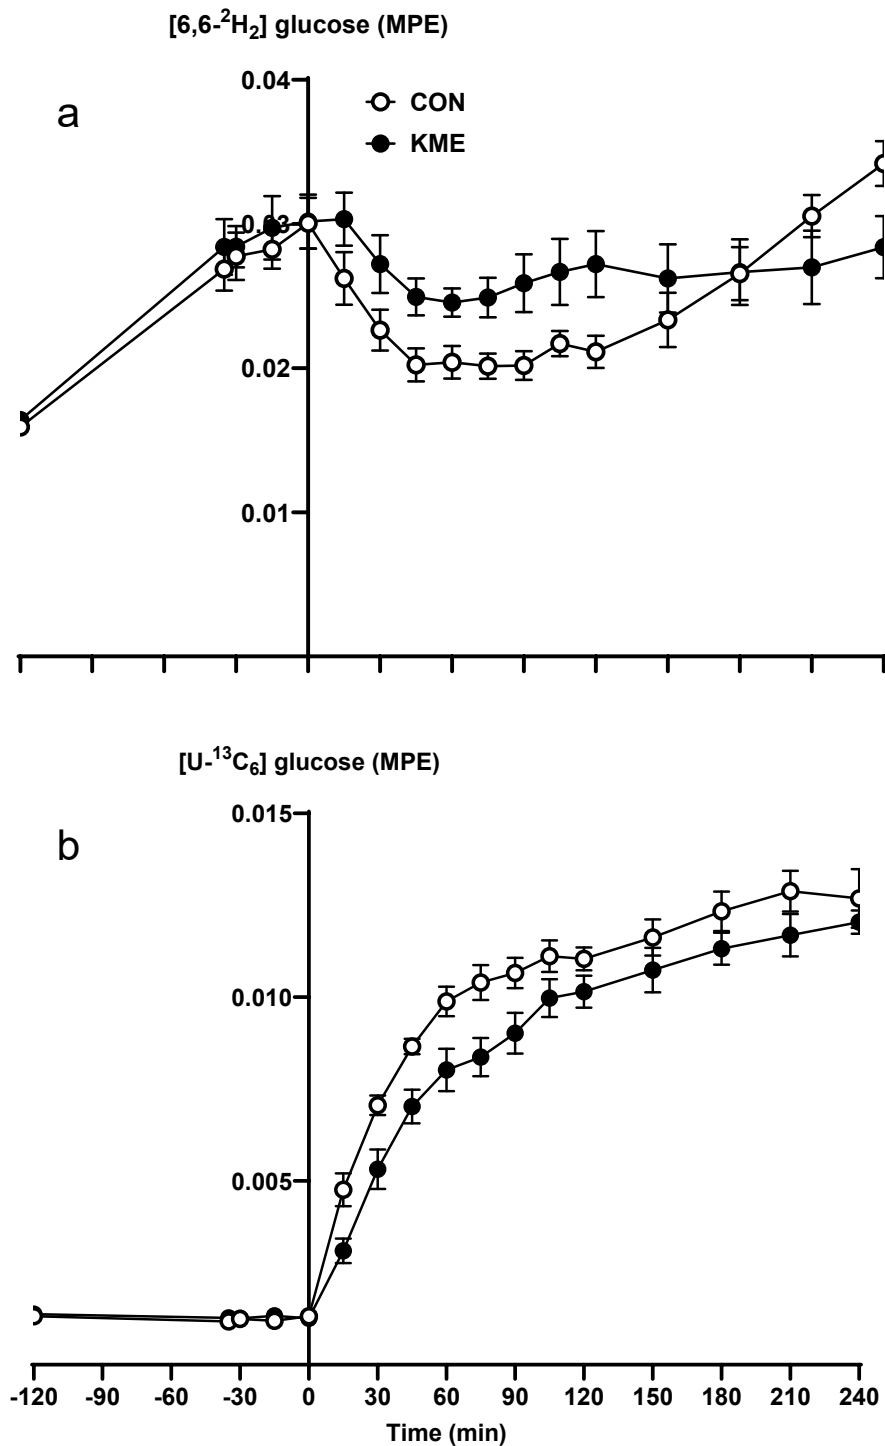

Time course of [U-<sup>13</sup>C<sub>6</sub>]glucose (A) and [6,6-<sup>2</sup>H<sub>2</sub>]glucose (B) enrichments following the ingestion of oral [U-<sup>13</sup>C<sub>6</sub>]glucose in a mixed meal tolerance test (MMTT; 75 g carbohydrate, 18 g protein, 12 g fat) and the primed-continuous infusion of [6,6-<sup>2</sup>H<sub>2</sub>]glucose. Data were analysed using two-way repeated measures ANOVA (time × condition). Values are mean ±

SEM. MPE, mol % excess. a; time:  $p < 0.0001$ , condition:  $p = 0.0163$ , time x condition:  $p = 0.0004$ . a; time:  $p < 0.0001$ , condition:  $p = 0.0021$ , time x condition:  $p = 0.0358$ .
